# Supplementary material
Source: MDPI journal article supplement (https://www.mdpi.com/2076-3417/13/14/8226)
Supplement: s1 [file s1]

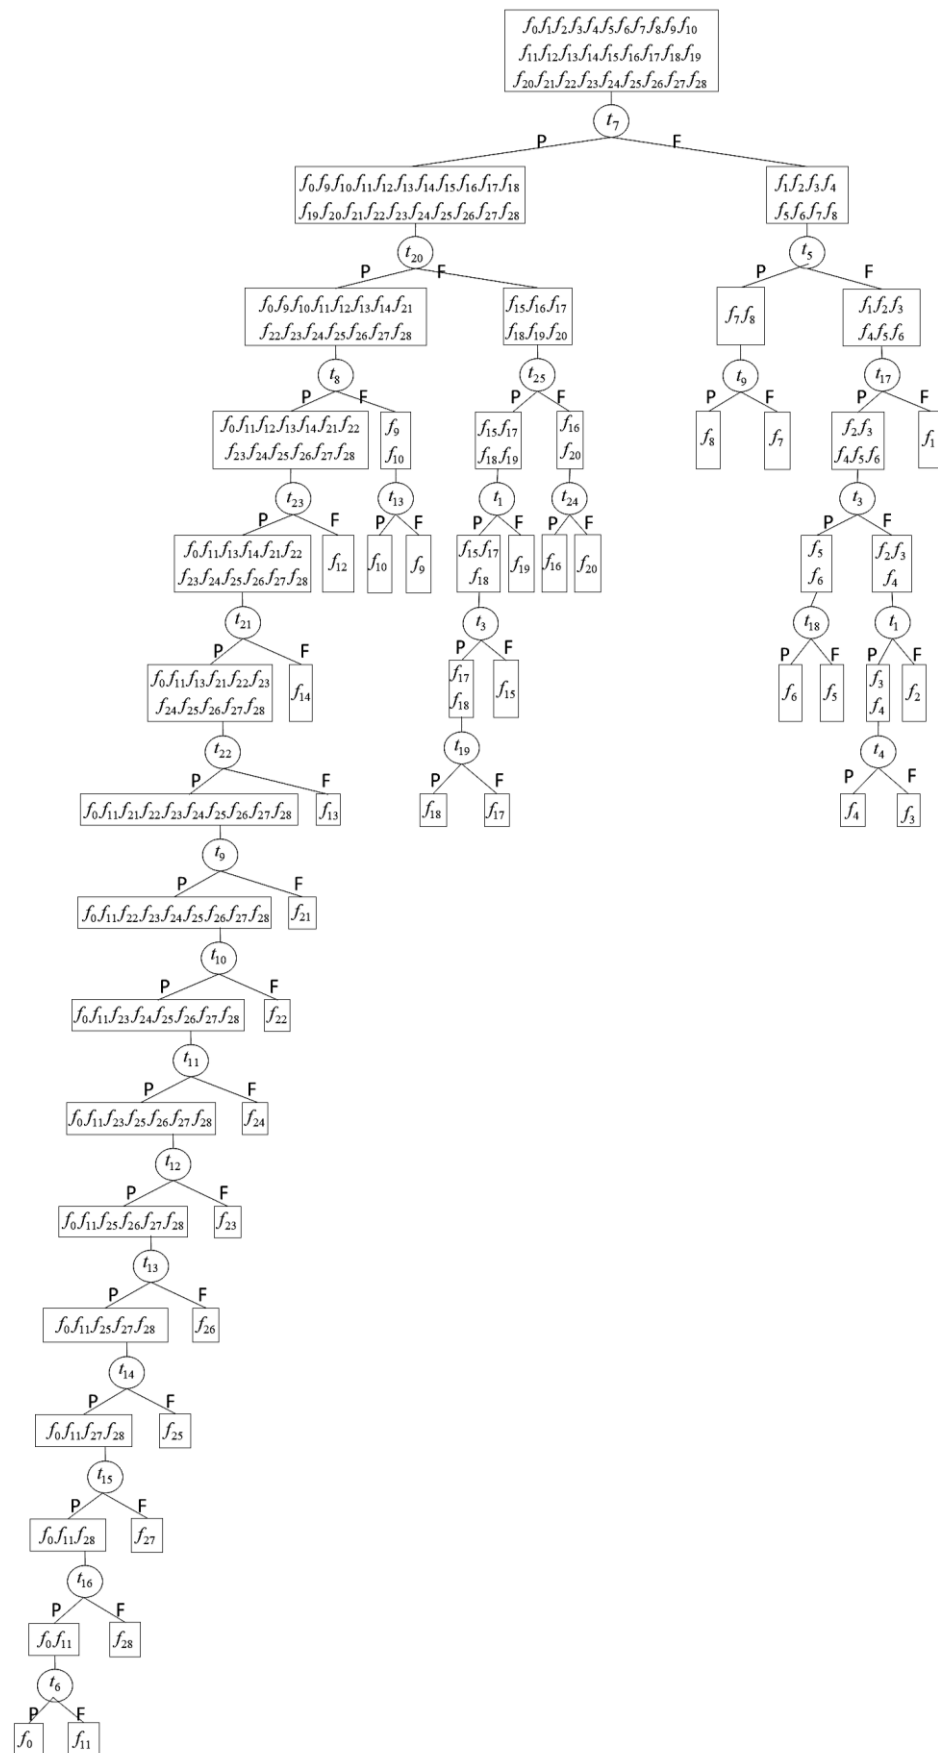

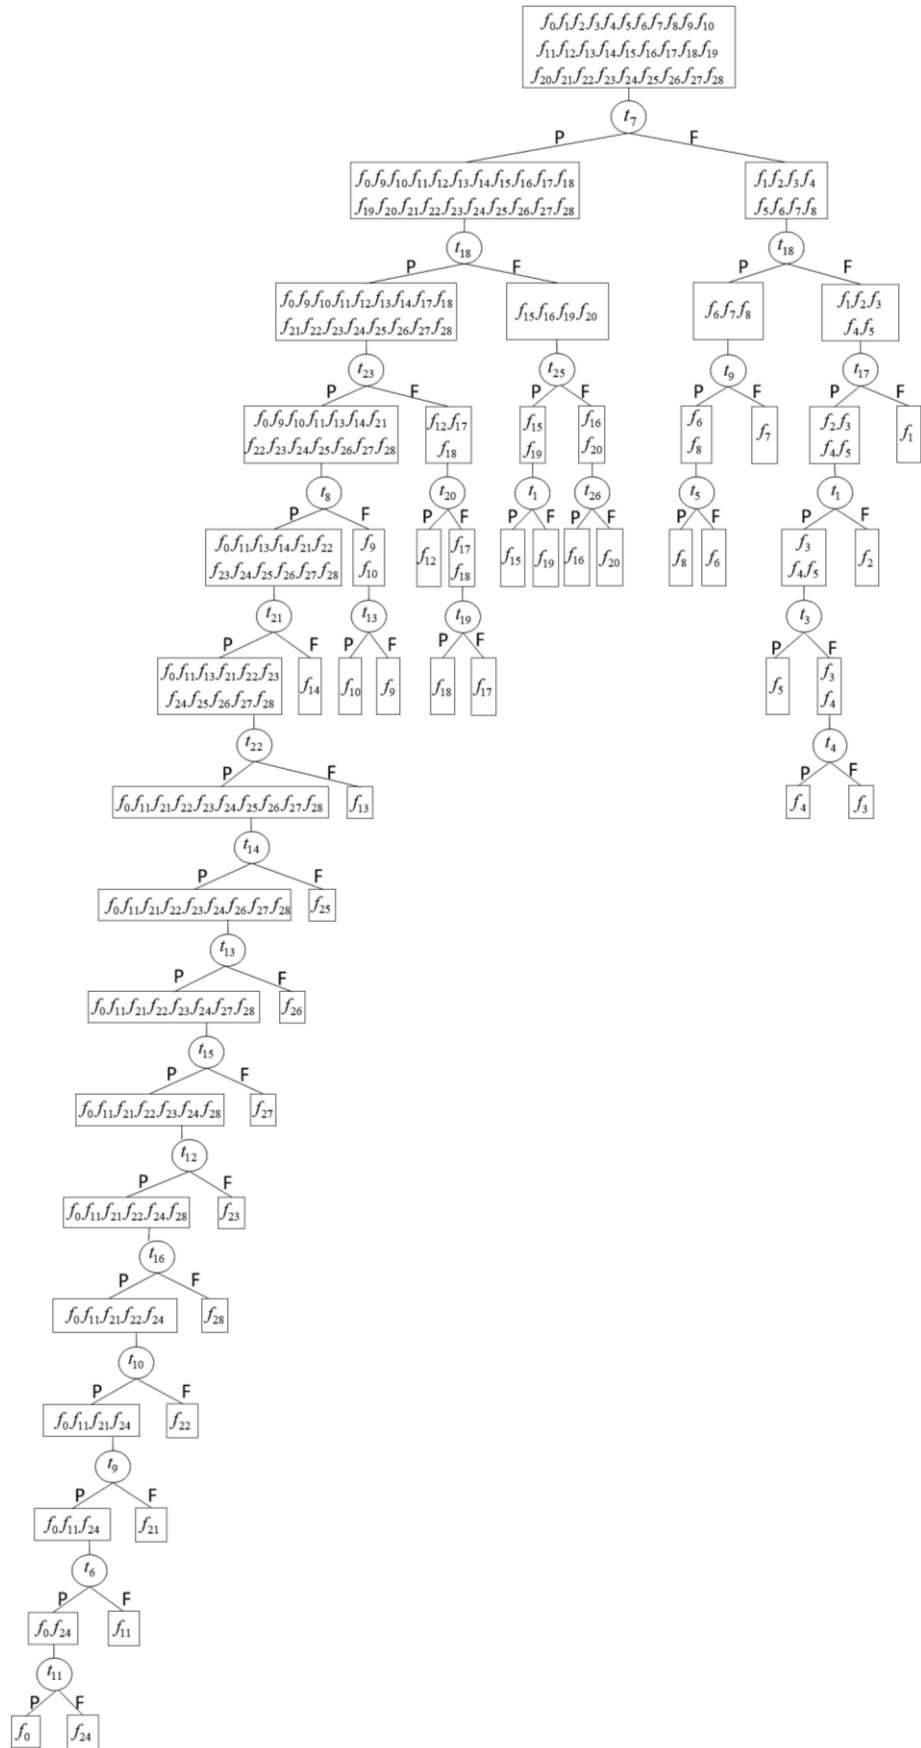

**Figure S2.** Fault diagnosis tree of traction system under unreliable test.

Table S1. The FMECA of Traction system.

5

| number | components                               | fault    | specific failure mode              | failure | failure rate $\lambda$ |
|--------|------------------------------------------|----------|------------------------------------|---------|------------------------|
| 1      | three-position isolating switch          | $f_1$    | main isolating switch failure      | V       | 0.57                   |
| 2      | high-speed circuit breaker               | $f_2$    | high-speed circuit breaker failure | III     | 0.21                   |
| 3      | charging contactor                       | $f_3$    | charging contactor fault           | III     | 0.19                   |
| 4      | charging resistance                      | $f_4$    | charging resistance failure        | IV      | 0.15                   |
| 5      | reactorL                                 | $f_5$    | reactor failure                    | IV      | 0.19                   |
| 6      | DC capacitance                           | $f_6$    | capacitor failure                  | V       | 0.19                   |
| 7      | converter module 1                       | $f_7$    | IGBT fault                         | III     | 0.60                   |
|        |                                          | $f_8$    | module burnout                     | III     | 0.91                   |
|        |                                          | $f_9$    | IGBT failure                       | III     | 0.60                   |
| 8      | converter module 2                       | $f_{10}$ | module burnout                     | III     | 0.91                   |
|        |                                          | $f_{11}$ | drive power failure                | III     | 0.10                   |
| 9      | drive power                              | $f_{11}$ | drive power failure                | III     | 0.10                   |
| 10     | pulse distribution board                 | $f_{12}$ | pulse distribution board fault     | III     | 0.90                   |
| 11     | driver board                             | $f_{13}$ | driver board fault                 | III     | 0.60                   |
| 12     | radiator                                 | $f_{14}$ | radiator fault                     | III     | 0.60                   |
| 13     | auxiliary processing unit APU            | $f_{15}$ | APU fault                          | III     | 0.60                   |
| 14     | signal processing unit SPU               | $f_{16}$ | SPU fault                          | III     | 0.89                   |
| 15     | motor control unit MCU                   | $f_{17}$ | MCU fault                          | III     | 0.30                   |
| 16     | pulse conversion unit PCU                | $f_{18}$ | PCU fault                          | III     | 0.30                   |
| 17     | system management and communications SMC | $f_{19}$ | SMC fault                          | III     | 0.60                   |
| 18     | Switching powerPWR                       | $f_{20}$ | PWR fault                          | III     | 0.40                   |
| 19     | traction motor 1                         | $f_{21}$ | motor overtemperature              | III     | 0.38                   |
|        |                                          | $f_{22}$ | motor overspeed                    | III     | 0.38                   |
|        |                                          | $f_{23}$ | motor overspeed                    | III     | 0.38                   |
| 20     | traction motor 2                         | $f_{24}$ | motor overtemperature              | III     | 0.38                   |
|        |                                          | $f_{25}$ | motor overspeed                    | III     | 0.38                   |
| 21     | traction motor 3                         | $f_{26}$ | motor overtemperature              | III     | 0.38                   |
|        |                                          | $f_{27}$ | motor overspeed                    | III     | 0.38                   |
| 22     | traction motor 4                         | $f_{28}$ | motor overtemperature              | III     | 0.38                   |
|        |                                          |          |                                    |         |                        |

6

7

**Table S2.** Complete test set failure-test dependency matrix(a)

8

|          | $t_1$ | $t_2$ | $t_3$ | $t_4$ | $t_5$ | $t_6$ | $t_7$ | $t_8$ | $t_9$ | $t_{10}$ | $t_{11}$ | $t_{12}$ |
|----------|-------|-------|-------|-------|-------|-------|-------|-------|-------|----------|----------|----------|
| $f_1$    | 1     | 1     | 1     | 0     | 1     | 0     | 1     | 1     | 0     | 0        | 0        | 0        |
| $f_2$    | 0     | 1     | 1     | 0     | 1     | 0     | 1     | 1     | 0     | 0        | 0        | 0        |
| $f_3$    | 0     | 0     | 1     | 1     | 1     | 0     | 1     | 1     | 0     | 0        | 0        | 0        |
| $f_4$    | 0     | 0     | 1     | 0     | 1     | 0     | 1     | 1     | 0     | 0        | 0        | 0        |
| $f_5$    | 0     | 0     | 0     | 0     | 1     | 0     | 1     | 1     | 0     | 0        | 0        | 0        |
| $f_6$    | 0     | 0     | 0     | 0     | 1     | 0     | 1     | 1     | 0     | 0        | 0        | 0        |
| $f_7$    | 0     | 0     | 0     | 0     | 0     | 0     | 1     | 0     | 1     | 0        | 0        | 0        |
| $f_8$    | 0     | 0     | 0     | 0     | 0     | 0     | 1     | 0     | 0     | 0        | 0        | 0        |
| $f_9$    | 0     | 0     | 0     | 0     | 0     | 0     | 0     | 1     | 0     | 0        | 0        | 0        |
| $f_{10}$ | 0     | 0     | 0     | 0     | 0     | 0     | 0     | 1     | 0     | 0        | 0        | 0        |
| $f_{11}$ | 0     | 0     | 0     | 0     | 0     | 1     | 0     | 0     | 0     | 0        | 0        | 0        |
| $f_{12}$ | 0     | 0     | 0     | 0     | 0     | 0     | 0     | 0     | 0     | 0        | 0        | 0        |
| $f_{13}$ | 0     | 0     | 0     | 0     | 0     | 0     | 0     | 0     | 0     | 0        | 0        | 0        |
| $f_{14}$ | 0     | 0     | 0     | 0     | 0     | 0     | 0     | 0     | 0     | 0        | 0        | 0        |
| $f_{15}$ | 0     | 0     | 1     | 0     | 0     | 0     | 0     | 0     | 0     | 0        | 0        | 0        |
| $f_{16}$ | 0     | 0     | 1     | 0     | 0     | 0     | 0     | 0     | 0     | 0        | 0        | 0        |
| $f_{17}$ | 0     | 0     | 0     | 0     | 0     | 0     | 0     | 0     | 0     | 0        | 0        | 0        |
| $f_{18}$ | 0     | 0     | 0     | 0     | 0     | 0     | 0     | 0     | 0     | 0        | 0        | 0        |
| $f_{19}$ | 1     | 0     | 1     | 1     | 0     | 0     | 0     | 0     | 0     | 0        | 0        | 0        |
| $f_{20}$ | 0     | 0     | 1     | 0     | 0     | 0     | 0     | 0     | 0     | 0        | 0        | 0        |
| $f_{21}$ | 0     | 0     | 0     | 0     | 0     | 0     | 0     | 0     | 1     | 0        | 0        | 0        |
| $f_{22}$ | 0     | 0     | 0     | 0     | 0     | 0     | 0     | 0     | 0     | 1        | 0        | 0        |
| $f_{23}$ | 0     | 0     | 0     | 0     | 0     | 0     | 0     | 0     | 0     | 0        | 0        | 1        |
| $f_{24}$ | 0     | 0     | 0     | 0     | 0     | 0     | 0     | 0     | 0     | 0        | 1        | 0        |
| $f_{25}$ | 0     | 0     | 0     | 0     | 0     | 0     | 0     | 0     | 0     | 0        | 0        | 0        |
| $f_{26}$ | 0     | 0     | 0     | 0     | 0     | 0     | 0     | 0     | 0     | 0        | 0        | 0        |
| $f_{27}$ | 0     | 0     | 0     | 0     | 0     | 0     | 0     | 0     | 0     | 0        | 0        | 0        |
| $f_{28}$ | 0     | 0     | 0     | 0     | 0     | 0     | 0     | 0     | 0     | 0        | 0        | 0        |

9

**Table S2.** Complete test set failure-test dependency matrix(b)

10

| $f_i$    | $t_{13}$ | $t_{14}$ | $t_{15}$ | $t_{16}$ | $t_{17}$ | $t_{18}$ | $t_{19}$ | $t_{20}$ | $t_{21}$ | $t_{22}$ | $t_{23}$ | $t_{24}$ |
|----------|----------|----------|----------|----------|----------|----------|----------|----------|----------|----------|----------|----------|
| $f_1$    | 0        | 0        | 0        | 0        | 1        | 0        | 0        | 0        | 0        | 0        | 0        | 0        |
| $f_2$    | 0        | 0        | 0        | 0        | 1        | 0        | 0        | 0        | 0        | 0        | 0        | 0        |
| $f_3$    | 0        | 0        | 0        | 0        | 1        | 0        | 0        | 0        | 0        | 0        | 0        | 0        |
| $f_4$    | 0        | 0        | 0        | 0        | 1        | 0        | 0        | 0        | 0        | 0        | 0        | 0        |
| $f_5$    | 0        | 0        | 0        | 0        | 1        | 0        | 0        | 0        | 0        | 0        | 0        | 0        |
| $f_6$    | 0        | 0        | 0        | 0        | 0        | 0        | 0        | 0        | 0        | 0        | 0        | 0        |
| $f_7$    | 0        | 0        | 0        | 0        | 0        | 0        | 0        | 0        | 0        | 0        | 0        | 0        |
| $f_8$    | 0        | 0        | 0        | 0        | 0        | 0        | 0        | 0        | 0        | 0        | 0        | 0        |
| $f_9$    | 1        | 0        | 0        | 0        | 0        | 0        | 0        | 0        | 0        | 0        | 0        | 0        |
| $f_{10}$ | 0        | 0        | 0        | 0        | 0        | 0        | 0        | 0        | 0        | 0        | 0        | 0        |
| $f_{11}$ | 0        | 0        | 0        | 0        | 0        | 0        | 0        | 0        | 0        | 0        | 0        | 0        |
| $f_{12}$ | 0        | 0        | 0        | 0        | 0        | 1        | 1        | 0        | 0        | 0        | 0        | 0        |
| $f_{13}$ | 0        | 0        | 0        | 0        | 0        | 1        | 0        | 0        | 0        | 0        | 0        | 0        |
| $f_{14}$ | 0        | 0        | 0        | 0        | 0        | 0        | 0        | 1        | 0        | 0        | 0        | 0        |
| $f_{15}$ | 0        | 0        | 0        | 0        | 1        | 0        | 0        | 0        | 0        | 1        | 1        | 0        |
| $f_{16}$ | 0        | 0        | 0        | 0        | 1        | 0        | 0        | 0        | 0        | 0        | 1        | 0        |
| $f_{17}$ | 0        | 0        | 0        | 0        | 0        | 1        | 1        | 0        | 0        | 0        | 1        | 1        |
| $f_{18}$ | 0        | 0        | 0        | 0        | 0        | 1        | 1        | 0        | 0        | 0        | 0        | 1        |
| $f_{19}$ | 0        | 0        | 0        | 0        | 1        | 0        | 0        | 0        | 0        | 0        | 1        | 0        |
| $f_{20}$ | 0        | 0        | 0        | 0        | 1        | 0        | 0        | 0        | 1        | 1        | 1        | 0        |
| $f_{21}$ | 0        | 0        | 0        | 0        | 0        | 0        | 0        | 0        | 0        | 0        | 0        | 0        |
| $f_{22}$ | 0        | 0        | 0        | 0        | 0        | 0        | 0        | 0        | 0        | 0        | 0        | 0        |
| $f_{23}$ | 0        | 0        | 0        | 0        | 0        | 0        | 0        | 0        | 0        | 0        | 0        | 0        |
| $f_{24}$ | 0        | 0        | 0        | 0        | 0        | 0        | 0        | 0        | 0        | 0        | 0        | 0        |
| $f_{25}$ | 0        | 1        | 0        | 0        | 0        | 0        | 0        | 0        | 0        | 0        | 0        | 0        |
| $f_{26}$ | 1        | 0        | 0        | 0        | 0        | 0        | 0        | 0        | 0        | 0        | 0        | 0        |
| $f_{27}$ | 0        | 0        | 1        | 0        | 0        | 0        | 0        | 0        | 0        | 0        | 0        | 0        |
| $f_{28}$ | 0        | 0        | 0        | 1        | 0        | 0        | 0        | 0        | 0        | 0        | 0        | 0        |

12

Table S3. Expert cloud matrix 1.

|          | $B_1$             | $B_2$             | $B_3$             | $B_4$             | $B_5$             |
|----------|-------------------|-------------------|-------------------|-------------------|-------------------|
| $t_1$    | (90,1.031,0.13)   | (96.91,0.64,0.08) | (96.91,0.64,0.08) | (90,1.031,0.13)   | (93.09,0.64,0.08) |
| $t_2$    | (96.91,0.64,0.08) | (93.09,0.64,0.08) | (93.09,0.64,0.08) | (100,1.031,0.13)  | (95,0.39,0.053)   |
| $t_3$    | (100,1.031,0.13)  | (96.91,0.64,0.08) | (90,1.031,0.13)   | (100,1.031,0.13)  | (93.09,0.64,0.08) |
| $t_4$    | (96.91,0.64,0.08) | (100,1.031,0.13)  | (96.91,0.64,0.08) | (100,1.031,0.13)  | (100,1.031,0.13)  |
| $t_5$    | (93.09,0.64,0.08) | (100,1.031,0.13)  | (90,1.031,0.13)   | (100,1.031,0.13)  | (96.91,0.64,0.08) |
| $t_6$    | (96.91,0.64,0.08) | (100,1.031,0.13)  | (95,0.39,0.053)   | (95,0.39,0.053)   | (93.09,0.64,0.08) |
| $t_7$    | (95,0.39,0.053)   | (93.09,0.64,0.08) | (100,1.031,0.13)  | (100,1.031,0.13)  | (93.09,0.64,0.08) |
| $t_8$    | (93.09,0.64,0.08) | (95,0.39,0.053)   | (95,0.39,0.053)   | (96.91,0.64,0.08) | (100,1.031,0.13)  |
| $t_9$    | (90,1.031,0.13)   | (100,1.031,0.13)  | (93.09,0.64,0.08) | (95,0.39,0.053)   | (93.09,0.64,0.08) |
| $t_{10}$ | (90,1.031,0.13)   | (90,1.031,0.13)   | (96.91,0.64,0.08) | (100,1.031,0.13)  | (93.09,0.64,0.08) |
| $t_{11}$ | (93.09,0.64,0.08) | (100,1.031,0.13)  | (96.91,0.64,0.08) | (95,0.39,0.053)   | (90,1.031,0.13)   |
| $t_{12}$ | (100,1.031,0.13)  | (95,0.39,0.053)   | (93.09,0.64,0.08) | (96.91,0.64,0.08) | (95,0.39,0.053)   |
| $t_{13}$ | (100,1.031,0.13)  | (100,1.031,0.13)  | (96.91,0.64,0.08) | (95,0.39,0.053)   | (100,1.031,0.13)  |
| $t_{14}$ | (100,1.031,0.13)  | (96.91,0.64,0.08) | (93.09,0.64,0.08) | (100,1.031,0.13)  | (95,0.39,0.053)   |
| $t_{15}$ | (90,1.031,0.13)   | (93.09,0.64,0.08) | (90,1.031,0.13)   | (90,1.031,0.13)   | (95,0.39,0.053)   |
| $t_{16}$ | (96.91,0.64,0.08) | (95,0.39,0.053)   | (95,0.39,0.053)   | (96.91,0.64,0.08) | (95,0.39,0.053)   |
| $t_{17}$ | (96.91,0.64,0.08) | (100,1.031,0.13)  | (90,1.031,0.13)   | (93.09,0.64,0.08) | (90,1.031,0.13)   |
| $t_{18}$ | (95,0.39,0.053)   | (90,1.031,0.13)   | (95,0.39,0.053)   | (90,1.031,0.13)   | (100,1.031,0.13)  |
| $t_{19}$ | (95,0.39,0.053)   | (93.09,0.64,0.08) | (95,0.39,0.053)   | (96.91,0.64,0.08) | (93.09,0.64,0.08) |
| $t_{20}$ | (100,1.031,0.13)  | (95,0.39,0.053)   | (95,0.39,0.053)   | (95,0.39,0.053)   | (90,1.031,0.13)   |
| $t_{21}$ | (95,0.39,0.053)   | (95,0.39,0.053)   | (93.09,0.64,0.08) | (96.91,0.64,0.08) | (95,0.39,0.053)   |
| $t_{22}$ | (100,1.031,0.13)  | (93.09,0.64,0.08) | (93.09,0.64,0.08) | (93.09,0.64,0.08) | (90,1.031,0.13)   |
| $t_{23}$ | (95,0.39,0.053)   | (95,0.39,0.053)   | (100,1.031,0.13)  | (96.91,0.64,0.08) | (95,0.39,0.053)   |
| $t_{24}$ | (90,1.031,0.13)   | (96.91,0.64,0.08) | (96.91,0.64,0.08) | (100,1.031,0.13)  | (95,0.39,0.053)   |
| $t_{25}$ | (95,0.39,0.053)   | (100,1.031,0.13)  | (100,1.031,0.13)  | (90,1.031,0.13)   | (100,1.031,0.13)  |
| $t_{26}$ | (100,1.031,0.13)  | (100,1.031,0.13)  | (96.91,0.64,0.08) | (90,1.031,0.13)   | (100,1.031,0.13)  |

Table S3. Expert cloud matrix 2.

|          | $B_1$             | $B_2$             | $B_3$             | $B_4$             | $B_5$             |
|----------|-------------------|-------------------|-------------------|-------------------|-------------------|
| $t_1$    | (93.09,0.64,0.08) | (96.91,0.64,0.08) | (100,1.031,0.13)  | (100,1.031,0.13)  | (90,1.031,0.13)   |
| $t_2$    | (96.91,0.64,0.08) | (90,1.031,0.13)   | (90,1.031,0.13)   | (96.91,0.64,0.08) | (95,0.39,0.053)   |
| $t_3$    | (100,1.031,0.13)  | (100,1.031,0.13)  | (93.09,0.64,0.08) | (96.91,0.64,0.08) | (93.09,0.64,0.08) |
| $t_4$    | (93.09,0.64,0.08) | (96.91,0.64,0.08) | (96.91,0.64,0.08) | (90,1.031,0.13)   | (100,1.031,0.13)  |
| $t_5$    | (90,1.031,0.13)   | (95,0.39,0.053)   | (93.09,0.64,0.08) | (96.91,0.64,0.08) | (96.91,0.64,0.08) |
| $t_6$    | (93.09,0.64,0.08) | (93.09,0.64,0.08) | (90,1.031,0.13)   | (96.91,0.64,0.08) | (93.09,0.64,0.08) |
| $t_7$    | (96.91,0.64,0.08) | (95,0.39,0.053)   | (95,0.39,0.053)   | (90,1.031,0.13)   | (90,1.031,0.13)   |
| $t_8$    | (96.91,0.64,0.08) | (100,1.031,0.13)  | (93.09,0.64,0.08) | (100,1.031,0.13)  | (96.91,0.64,0.08) |
| $t_9$    | (93.09,0.64,0.08) | (100,1.031,0.13)  | (93.09,0.64,0.08) | (96.91,0.64,0.08) | (96.91,0.64,0.08) |
| $t_{10}$ | (93.09,0.64,0.08) | (95,0.39,0.053)   | (95,0.39,0.053)   | (93.09,0.64,0.08) | (100,1.031,0.13)  |
| $t_{11}$ | (93.09,0.64,0.08) | (96.91,0.64,0.08) | (90,1.031,0.13)   | (90,1.031,0.13)   | (100,1.031,0.13)  |
| $t_{12}$ | (90,1.031,0.13)   | (93.09,0.64,0.08) | (95,0.39,0.053)   | (90,1.031,0.13)   | (100,1.031,0.13)  |
| $t_{13}$ | (90,1.031,0.13)   | (90,1.031,0.13)   | (96.91,0.64,0.08) | (100,1.031,0.13)  | (96.91,0.64,0.08) |
| $t_{14}$ | (93.09,0.64,0.08) | (93.09,0.64,0.08) | (96.91,0.64,0.08) | (96.91,0.64,0.08) | (93.09,0.64,0.08) |
| $t_{15}$ | (95,0.39,0.053)   | (96.91,0.64,0.08) | (90,1.031,0.13)   | (93.09,0.64,0.08) | (100,1.031,0.13)  |
| $t_{16}$ | (100,1.031,0.13)  | (95,0.39,0.053)   | (100,1.031,0.13)  | (96.91,0.64,0.08) | (95,0.39,0.053)   |
| $t_{17}$ | (93.09,0.64,0.08) | (96.91,0.64,0.08) | (95,0.39,0.053)   | (96.91,0.64,0.08) | (96.91,0.64,0.08) |
| $t_{18}$ | (90,1.031,0.13)   | (93.09,0.64,0.08) | (90,1.031,0.13)   | (93.09,0.64,0.08) | (95,0.39,0.053)   |
| $t_{19}$ | (90,1.031,0.13)   | (96.91,0.64,0.08) | (95,0.39,0.053)   | (90,1.031,0.13)   | (90,1.031,0.13)   |
| $t_{20}$ | (90,1.031,0.13)   | (93.09,0.64,0.08) | (95,0.39,0.053)   | (95,0.39,0.053)   | (95,0.39,0.053)   |
| $t_{21}$ | (90,1.031,0.13)   | (100,1.031,0.13)  | (96.91,0.64,0.08) | (90,1.031,0.13)   | (95,0.39,0.053)   |
| $t_{22}$ | (100,1.031,0.13)  | (96.91,0.64,0.08) | (96.91,0.64,0.08) | (93.09,0.64,0.08) | (100,1.031,0.13)  |
| $t_{23}$ | (90,1.031,0.13)   | (96.91,0.64,0.08) | (93.09,0.64,0.08) | (90,1.031,0.13)   | (95,0.39,0.053)   |
| $t_{24}$ | (100,1.031,0.13)  | (96.91,0.64,0.08) | (95,0.39,0.053)   | (100,1.031,0.13)  | (90,1.031,0.13)   |
| $t_{25}$ | (93.09,0.64,0.08) | (90,1.031,0.13)   | (93.09,0.64,0.08) | (100,1.031,0.13)  | (96.91,0.64,0.08) |
| $t_{26}$ | (95,0.39,0.053)   | (90,1.031,0.13)   | (95,0.39,0.053)   | (93.09,0.64,0.08) | (93.09,0.64,0.08) |

Table S3. Expert cloud matrix 3.

|          | $B_1$             | $B_2$             | $B_3$             | $B_4$             | $B_5$             |
|----------|-------------------|-------------------|-------------------|-------------------|-------------------|
| $t_1$    | (96.91,0.64,0.08) | (90,1.031,0.13)   | (100,1.031,0.13)  | (95,0.39,0.053)   | (100,1.031,0.13)  |
| $t_2$    | (95,0.39,0.053)   | (95,0.39,0.053)   | (95,0.39,0.053)   | (96.91,0.64,0.08) | (90,1.031,0.13)   |
| $t_3$    | (93.09,0.64,0.08) | (93.09,0.64,0.08) | (100,1.031,0.13)  | (100,1.031,0.13)  | (90,1.031,0.13)   |
| $t_4$    | (90,1.031,0.13)   | (90,1.031,0.13)   | (90,1.031,0.13)   | (95,0.39,0.053)   | (90,1.031,0.13)   |
| $t_5$    | (96.91,0.64,0.08) | (93.09,0.64,0.08) | (95,0.39,0.053)   | (93.09,0.64,0.08) | (100,1.031,0.13)  |
| $t_6$    | (90,1.031,0.13)   | (90,1.031,0.13)   | (95,0.39,0.053)   | (90,1.031,0.13)   | (90,1.031,0.13)   |
| $t_7$    | (96.91,0.64,0.08) | (100,1.031,0.13)  | (95,0.39,0.053)   | (95,0.39,0.053)   | (100,1.031,0.13)  |
| $t_8$    | (96.91,0.64,0.08) | (96.91,0.64,0.08) | (100,1.031,0.13)  | (96.91,0.64,0.08) | (93.09,0.64,0.08) |
| $t_9$    | (93.09,0.64,0.08) | (90,1.031,0.13)   | (93.09,0.64,0.08) | (96.91,0.64,0.08) | (96.91,0.64,0.08) |
| $t_{10}$ | (100,1.031,0.13)  | (93.09,0.64,0.08) | (95,0.39,0.053)   | (100,1.031,0.13)  | (95,0.39,0.053)   |
| $t_{11}$ | (95,0.39,0.053)   | (93.09,0.64,0.08) | (95,0.39,0.053)   | (95,0.39,0.053)   | (90,1.031,0.13)   |
| $t_{12}$ | (90,1.031,0.13)   | (93.09,0.64,0.08) | (93.09,0.64,0.08) | (90,1.031,0.13)   | (93.09,0.64,0.08) |
| $t_{13}$ | (95,0.39,0.053)   | (93.09,0.64,0.08) | (90,1.031,0.13)   | (100,1.031,0.13)  | (96.91,0.64,0.08) |
| $t_{14}$ | (96.91,0.64,0.08) | (95,0.39,0.053)   | (90,1.031,0.13)   | (93.09,0.64,0.08) | (100,1.031,0.13)  |
| $t_{15}$ | (90,1.031,0.13)   | (93.09,0.64,0.08) | (96.91,0.64,0.08) | (100,1.031,0.13)  | (95,0.39,0.053)   |
| $t_{16}$ | (90,1.031,0.13)   | (96.91,0.64,0.08) | (100,1.031,0.13)  | (93.09,0.64,0.08) | (96.91,0.64,0.08) |
| $t_{17}$ | (95,0.39,0.053)   | (100,1.031,0.13)  | (100,1.031,0.13)  | (93.09,0.64,0.08) | (95,0.39,0.053)   |
| $t_{18}$ | (100,1.031,0.13)  | (95,0.39,0.053)   | (93.09,0.64,0.08) | (93.09,0.64,0.08) | (95,0.39,0.053)   |
| $t_{19}$ | (96.91,0.64,0.08) | (90,1.031,0.13)   | (93.09,0.64,0.08) | (96.91,0.64,0.08) | (96.91,0.64,0.08) |
| $t_{20}$ | (93.09,0.64,0.08) | (90,1.031,0.13)   | (96.91,0.64,0.08) | (96.91,0.64,0.08) | (95,0.39,0.053)   |
| $t_{21}$ | (95,0.39,0.053)   | (96.91,0.64,0.08) | (100,1.031,0.13)  | (96.91,0.64,0.08) | (96.91,0.64,0.08) |
| $t_{22}$ | (95,0.39,0.053)   | (90,1.031,0.13)   | (95,0.39,0.053)   | (96.91,0.64,0.08) | (96.91,0.64,0.08) |
| $t_{23}$ | (96.91,0.64,0.08) | (100,1.031,0.13)  | (95,0.39,0.053)   | (90,1.031,0.13)   | (96.91,0.64,0.08) |
| $t_{24}$ | (93.09,0.64,0.08) | (100,1.031,0.13)  | (100,1.031,0.13)  | (93.09,0.64,0.08) | (90,1.031,0.13)   |
| $t_{25}$ | (90,1.031,0.13)   | (93.09,0.64,0.08) | (100,1.031,0.13)  | (96.91,0.64,0.08) | (93.09,0.64,0.08) |
| $t_{26}$ | (95,0.39,0.053)   | (95,0.39,0.053)   | (93.09,0.64,0.08) | (90,1.031,0.13)   | (100,1.031,0.13)  |

Table S3. Expert cloud matrix 4.

|          | $B_1$             | $B_2$             | $B_3$             | $B_4$             | $B_5$             |
|----------|-------------------|-------------------|-------------------|-------------------|-------------------|
| $t_1$    | (100,1.031,0.13)  | (93.09,0.64,0.08) | (93.09,0.64,0.08) | (90,1.031,0.13)   | (90,1.031,0.13)   |
| $t_2$    | (95,0.39,0.053)   | (96.91,0.64,0.08) | (96.91,0.64,0.08) | (90,1.031,0.13)   | (90,1.031,0.13)   |
| $t_3$    | (100,1.031,0.13)  | (93.09,0.64,0.08) | (90,1.031,0.13)   | (95,0.39,0.053)   | (93.09,0.64,0.08) |
| $t_4$    | (93.09,0.64,0.08) | (96.91,0.64,0.08) | (90,1.031,0.13)   | (93.09,0.64,0.08) | (90,1.031,0.13)   |
| $t_5$    | (95,0.39,0.053)   | (96.91,0.64,0.08) | (93.09,0.64,0.08) | (95,0.39,0.053)   | (95,0.39,0.053)   |
| $t_6$    | (95,0.39,0.053)   | (96.91,0.64,0.08) | (95,0.39,0.053)   | (95,0.39,0.053)   | (100,1.031,0.13)  |
| $t_7$    | (93.09,0.64,0.08) | (90,1.031,0.13)   | (96.91,0.64,0.08) | (90,1.031,0.13)   | (100,1.031,0.13)  |
| $t_8$    | (90,1.031,0.13)   | (93.09,0.64,0.08) | (90,1.031,0.13)   | (90,1.031,0.13)   | (90,1.031,0.13)   |
| $t_9$    | (96.91,0.64,0.08) | (90,1.031,0.13)   | (96.91,0.64,0.08) | (100,1.031,0.13)  | (90,1.031,0.13)   |
| $t_{10}$ | (100,1.031,0.13)  | (90,1.031,0.13)   | (100,1.031,0.13)  | (93.09,0.64,0.08) | (93.09,0.64,0.08) |
| $t_{11}$ | (95,0.39,0.053)   | (95,0.39,0.053)   | (90,1.031,0.13)   | (96.91,0.64,0.08) | (90,1.031,0.13)   |
| $t_{12}$ | (90,1.031,0.13)   | (90,1.031,0.13)   | (95,0.39,0.053)   | (93.09,0.64,0.08) | (90,1.031,0.13)   |
| $t_{13}$ | (95,0.39,0.053)   | (90,1.031,0.13)   | (93.09,0.64,0.08) | (95,0.39,0.053)   | (93.09,0.64,0.08) |
| $t_{14}$ | (93.09,0.64,0.08) | (90,1.031,0.13)   | (95,0.39,0.053)   | (95,0.39,0.053)   | (96.91,0.64,0.08) |
| $t_{15}$ | (93.09,0.64,0.08) | (100,1.031,0.13)  | (93.09,0.64,0.08) | (96.91,0.64,0.08) | (96.91,0.64,0.08) |
| $t_{16}$ | (100,1.031,0.13)  | (93.09,0.64,0.08) | (90,1.031,0.13)   | (96.91,0.64,0.08) | (95,0.39,0.053)   |
| $t_{17}$ | (96.91,0.64,0.08) | (93.09,0.64,0.08) | (96.91,0.64,0.08) | (95,0.39,0.053)   | (93.09,0.64,0.08) |
| $t_{18}$ | (90,1.031,0.13)   | (95,0.39,0.053)   | (93.09,0.64,0.08) | (93.09,0.64,0.08) | (95,0.39,0.053)   |
| $t_{19}$ | (95,0.39,0.053)   | (96.91,0.64,0.08) | (90,1.031,0.13)   | (90,1.031,0.13)   | (90,1.031,0.13)   |
| $t_{20}$ | (93.09,0.64,0.08) | (90,1.031,0.13)   | (90,1.031,0.13)   | (96.91,0.64,0.08) | (93.09,0.64,0.08) |
| $t_{21}$ | (93.09,0.64,0.08) | (100,1.031,0.13)  | (90,1.031,0.13)   | (95,0.39,0.053)   | (90,1.031,0.13)   |
| $t_{22}$ | (90,1.031,0.13)   | (100,1.031,0.13)  | (100,1.031,0.13)  | (95,0.39,0.053)   | (100,1.031,0.13)  |
| $t_{23}$ | (90,1.031,0.13)   | (93.09,0.64,0.08) | (90,1.031,0.13)   | (100,1.031,0.13)  | (93.09,0.64,0.08) |
| $t_{24}$ | (96.91,0.64,0.08) | (93.09,0.64,0.08) | (96.91,0.64,0.08) | (93.09,0.64,0.08) | (93.09,0.64,0.08) |
| $t_{25}$ | (93.09,0.64,0.08) | (100,1.031,0.13)  | (96.91,0.64,0.08) | (96.91,0.64,0.08) | (100,1.031,0.13)  |
| $t_{26}$ | (95,0.39,0.053)   | (96.91,0.64,0.08) | (100,1.031,0.13)  | (96.91,0.64,0.08) | (93.09,0.64,0.08) |

Table S4. Comprehensive Cloud Evaluation Matrix.

|          | $B_1$             | $B_2$             | $B_3$             | $B_4$             | $B_5$             |
|----------|-------------------|-------------------|-------------------|-------------------|-------------------|
| $t_1$    | (95.12,0.83,0.10) | (94.19,0.74,0.09) | (97.46,0.84,0.11) | (93.78,0.87,0.11) | (93.22,0.94,0.12) |
| $t_2$    | (95.93,0.51,0.07) | (93.78,0.68,0.09) | (93.78,0.68,0.09) | (95.83,0.83,0.10) | (92.45,0.72,0.09) |
| $t_3$    | (98.28,0.93,0.12) | (95.74,0.74,0.09) | (93.27,0.93,0.12) | (97.91,0.76,0.10) | (92.32,0.74,0.09) |
| $t_4$    | (93.22,0.74,0.09) | (95.92,0.83,0.10) | (93.38,0.84,0.11) | (94.41,0.77,0.10) | (94.89,1.03,0.13) |
| $t_5$    | (93.76,0.67,0.09) | (96.20,0.67,0.08) | (92.84,0.67,0.09) | (96.19,0.67,0.08) | (97.18,0.67,0.09) |
| $t_6$    | (93.72,0.67,0.08) | (94.95,0.83,0.10) | (93.74,0.55,0.07) | (94.24,0.61,0.08) | (94.13,0.84,0.11) |
| $t_7$    | (95.45,0.58,0.07) | (94.48,0.78,0.09) | (96.68,0.61,0.08) | (93.61,0.87,0.11) | (95.84,0.94,0.12) |
| $t_8$    | (94.20,0.74,0.09) | (96.24,0.68,0.08) | (94.45,0.78,0.09) | (95.88,0.84,0.11) | (94.88,0.83,0.1)  |
| $t_9$    | (93.36,0.73,0.09) | (94.89,1.03,0.13) | (94.09,0.64,0.08) | (97.27,0.68,0.09) | (94.20,0.74,0.09) |
| $t_{10}$ | (95.89,0.93,0.12) | (92.03,0.77,0.10) | (96.76,0.62,0.08) | (96.44,0.83,0.10) | (95.31,0.68,0.09) |
| $t_{11}$ | (94.07,0.51,0.07) | (96.19,0.67,0.08) | (92.88,0.78,0.10) | (94.24,0.62,0.08) | (92.53,1.03,0.13) |
| $t_{12}$ | (92.36,1.03,0.13) | (92.73,0.68,0.09) | (94.07,0.51,0.06) | (92.44,0.84,0.11) | (94.48,0.78,0.10) |
| $t_{13}$ | (94.92,0.70,0.09) | (93.13,0.93,0.12) | (94.19,0.74,0.09) | (97.51,0.71,0.09) | (96.64,0.74,0.09) |
| $t_{14}$ | (95.67,0.73,0.09) | (93.66,0.68,0.08) | (93.79,0.67,0.09) | (96.19,0.67,0.08) | (96.26,0.68,0.08) |
| $t_{15}$ | (92.07,0.77,0.09) | (95.87,0.74,0.09) | (92.53,0.83,0.10) | (95.08,0.83,0.10) | (96.77,0.62,0.08) |
| $t_{16}$ | (96.78,0.94,0.12) | (94.98,0.52,0.07) | (96.20,0.88,0.11) | (95.96,0.64,0.08) | (95.48,0.45,0.06) |
| $t_{17}$ | (95.47,0.58,0.07) | (97.40,0.83,0.10) | (95.57,0.77,0.10) | (94.56,0.57,0.07) | (93.80,0.67,0.09) |
| $t_{18}$ | (93.67,0.88,0.11) | (93.34,0.60,0.08) | (92.76,0.68,0.09) | (92.36,0.73,0.09) | (96.18,0.54,0.07) |
| $t_{19}$ | (94.21,0.61,0.08) | (94.29,0.74,0.09) | (93.21,0.62,0.08) | (93.35,0.84,0.11) | (92.45,0.84,0.11) |
| $t_{20}$ | (93.93,0.83,0.10) | (91.96,0.78,0.10) | (94.17,0.62,0.08) | (95.98,0.52,0.07) | (93.32,0.61,0.08) |
| $t_{21}$ | (93.23,0.62,0.08) | (98.05,0.78,0.10) | (94.97,0.84,0.11) | (94.66,0.67,0.09) | (94.17,0.62,0.08) |
| $t_{22}$ | (96.14,0.87,0.11) | (95.10,0.84,0.11) | (96.34,0.68,0.09) | (94.54,0.57,0.07) | (96.87,0.93,0.12) |
| $t_{23}$ | (92.90,0.78,0.10) | (96.23,0.68,0.09) | (94.39,0.77,0.10) | (94.25,0.94,0.12) | (94.98,0.52,0.07) |
| $t_{24}$ | (95.11,0.83,0.10) | (96.68,0.74,0.09) | (97.20,0.67,0.09) | (96.47,0.83,0.10) | (91.99,0.78,0.10) |

**Table S5.** Reliability failure - test dependency matrix (a) (Unity: %)

|          | $t_1$ | $t_2$ | $t_3$ | $t_4$ | $t_5$ | $t_6$ | $t_7$ | $t_8$ | $t_9$ | $t_{10}$ | $t_{11}$ | $t_{12}$ |
|----------|-------|-------|-------|-------|-------|-------|-------|-------|-------|----------|----------|----------|
| $f_1$    | 94.75 | 94.4  | 95.5  | 5.64  | 95.23 | 5.84  | 95.21 | 95.13 | 5.24  | 4.71     | 6.02     | 6.78     |
| $f_2$    | 5.25  | 94.4  | 95.5  | 5.64  | 95.23 | 5.84  | 95.21 | 95.13 | 5.24  | 4.71     | 6.02     | 6.78     |
| $f_3$    | 5.25  | 5.6   | 95.5  | 94.36 | 95.23 | 5.84  | 95.21 | 95.13 | 5.24  | 4.71     | 6.02     | 6.78     |
| $f_4$    | 5.25  | 5.6   | 95.5  | 5.64  | 95.23 | 5.84  | 95.21 | 95.13 | 5.24  | 4.71     | 6.02     | 6.78     |
| $f_5$    | 5.25  | 5.6   | 4.5   | 5.64  | 95.23 | 5.84  | 95.21 | 95.13 | 5.24  | 4.71     | 6.02     | 6.78     |
| $f_6$    | 5.25  | 5.6   | 4.5   | 5.64  | 95.23 | 5.84  | 95.21 | 95.13 | 5.24  | 4.71     | 6.02     | 6.78     |
| $f_7$    | 5.25  | 5.6   | 4.5   | 5.64  | 4.77  | 5.84  | 95.21 | 4.87  | 94.76 | 4.71     | 6.02     | 6.78     |
| $f_8$    | 5.25  | 5.6   | 4.5   | 5.64  | 4.77  | 5.84  | 95.21 | 4.87  | 5.24  | 4.71     | 6.02     | 6.78     |
| $f_9$    | 5.25  | 5.6   | 4.5   | 5.64  | 4.77  | 5.84  | 4.79  | 95.13 | 5.24  | 4.71     | 6.02     | 6.78     |
| $f_{10}$ | 5.25  | 5.6   | 4.5   | 5.64  | 4.77  | 5.84  | 4.79  | 95.13 | 5.24  | 4.71     | 6.02     | 6.78     |
| $f_{11}$ | 5.25  | 5.6   | 4.5   | 5.64  | 4.77  | 94.16 | 4.79  | 4.87  | 5.24  | 4.71     | 6.02     | 6.78     |
| $f_{12}$ | 5.25  | 5.6   | 4.5   | 5.64  | 4.77  | 5.84  | 4.79  | 4.87  | 5.24  | 4.71     | 6.02     | 6.78     |
| $f_{13}$ | 5.25  | 5.6   | 4.5   | 5.64  | 4.77  | 5.84  | 4.79  | 4.87  | 5.24  | 4.71     | 6.02     | 6.78     |
| $f_{14}$ | 5.25  | 5.6   | 4.5   | 5.64  | 4.77  | 5.84  | 4.79  | 4.87  | 5.24  | 4.71     | 6.02     | 6.78     |
| $f_{15}$ | 5.25  | 5.6   | 95.5  | 5.64  | 4.77  | 5.84  | 4.79  | 4.87  | 5.24  | 4.71     | 6.02     | 6.78     |
| $f_{16}$ | 5.25  | 5.6   | 95.5  | 5.64  | 4.77  | 5.84  | 4.79  | 4.87  | 5.24  | 4.71     | 6.02     | 6.78     |
| $f_{17}$ | 5.25  | 5.6   | 4.5   | 5.64  | 4.77  | 5.84  | 4.79  | 4.87  | 5.24  | 4.71     | 6.02     | 6.78     |
| $f_{18}$ | 5.25  | 5.6   | 4.5   | 5.64  | 4.77  | 5.84  | 4.79  | 4.87  | 5.24  | 4.71     | 6.02     | 6.78     |
| $f_{19}$ | 94.75 | 5.6   | 95.5  | 94.36 | 4.77  | 5.84  | 4.79  | 4.87  | 5.24  | 4.71     | 6.02     | 6.78     |
| $f_{20}$ | 5.25  | 5.6   | 95.5  | 5.64  | 4.77  | 5.84  | 4.79  | 4.87  | 5.24  | 4.71     | 6.02     | 6.78     |
| $f_{21}$ | 5.25  | 5.64  | 4.5   | 5.64  | 4.77  | 5.84  | 4.79  | 4.87  | 94.76 | 4.71     | 6.02     | 6.78     |
| $f_{22}$ | 5.25  | 5.64  | 4.5   | 5.64  | 4.77  | 5.84  | 4.79  | 4.87  | 5.24  | 95.29    | 6.02     | 6.78     |
| $f_{23}$ | 5.25  | 5.64  | 4.5   | 5.64  | 4.77  | 5.84  | 4.79  | 4.87  | 5.24  | 4.71     | 6.02     | 93.22    |
| $f_{24}$ | 5.25  | 5.64  | 4.5   | 5.64  | 4.77  | 5.84  | 4.79  | 4.87  | 5.24  | 4.71     | 94.0     | 6.78     |
| $f_{25}$ | 5.25  | 5.64  | 4.5   | 5.64  | 4.77  | 5.84  | 4.79  | 4.87  | 5.24  | 4.71     | 6.02     | 6.78     |
| $f_{26}$ | 5.25  | 5.64  | 4.5   | 5.64  | 4.77  | 5.84  | 4.79  | 4.87  | 5.24  | 4.71     | 6.02     | 6.78     |
| $f_{27}$ | 5.25  | 5.64  | 4.5   | 5.64  | 4.77  | 5.84  | 4.79  | 4.87  | 5.24  | 4.71     | 6.02     | 6.78     |
| $f_{28}$ | 5.25  | 5.64  | 4.5   | 5.64  | 4.77  | 5.84  | 4.79  | 4.87  | 5.24  | 4.71     | 6.02     | 6.78     |

**Table S5.** Reliability failure - test dependency matrix (b) (Unity: %)

|          | $t_{13}$ | $t_{14}$ | $t_{15}$ | $t_{16}$ | $t_{17}$ | $t_{18}$ | $t_{19}$ | $t_{20}$ | $t_{21}$ | $t_{22}$ | $t_{23}$ | $t_{24}$ |
|----------|----------|----------|----------|----------|----------|----------|----------|----------|----------|----------|----------|----------|
| $f_1$    | 4.72     | 4.89     | 5.54     | 4.12     | 95.36    | 6.34     | 6.5      | 6.13     | 4.98     | 4.2      | 5.45     | 4.51     |
| $f_2$    | 4.72     | 4.89     | 5.54     | 4.12     | 95.36    | 6.34     | 6.5      | 6.13     | 4.98     | 4.2      | 5.45     | 4.51     |
| $f_3$    | 4.72     | 4.89     | 5.54     | 4.12     | 95.36    | 6.34     | 6.5      | 6.13     | 4.98     | 4.2      | 5.45     | 4.51     |
| $f_4$    | 4.72     | 4.89     | 5.54     | 4.12     | 95.36    | 6.34     | 6.5      | 6.13     | 4.98     | 4.2      | 5.45     | 4.51     |
| $f_5$    | 4.72     | 4.89     | 5.54     | 4.12     | 95.36    | 6.34     | 6.5      | 6.13     | 4.98     | 4.2      | 5.45     | 4.51     |
| $f_6$    | 4.72     | 4.89     | 5.54     | 4.12     | 4.64     | 6.34     | 6.5      | 6.13     | 4.98     | 4.2      | 5.45     | 4.51     |
| $f_7$    | 4.72     | 4.89     | 5.54     | 4.12     | 4.64     | 6.34     | 6.5      | 6.13     | 4.98     | 4.2      | 5.45     | 4.51     |
| $f_8$    | 4.72     | 4.89     | 5.54     | 4.12     | 4.64     | 6.34     | 6.5      | 6.13     | 4.98     | 4.2      | 5.45     | 4.51     |
| $f_9$    | 95.28    | 4.89     | 5.54     | 4.12     | 4.64     | 6.34     | 6.5      | 6.13     | 4.98     | 4.2      | 5.45     | 4.51     |
| $f_{10}$ | 4.72     | 4.89     | 5.54     | 4.12     | 4.64     | 6.34     | 6.5      | 6.13     | 4.98     | 4.2      | 5.45     | 4.51     |
| $f_{11}$ | 4.72     | 4.89     | 5.54     | 4.12     | 4.64     | 6.34     | 6.5      | 6.13     | 4.98     | 4.2      | 5.45     | 4.51     |
| $f_{12}$ | 4.72     | 4.89     | 5.54     | 4.12     | 4.64     | 93.66    | 93.5     | 6.13     | 4.98     | 4.2      | 5.45     | 4.51     |
| $f_{13}$ | 4.72     | 4.89     | 5.54     | 4.12     | 4.64     | 93.66    | 6.5      | 6.13     | 4.98     | 4.2      | 5.45     | 4.51     |
| $f_{14}$ | 4.72     | 4.89     | 5.54     | 4.12     | 4.64     | 6.34     | 6.5      | 93.87    | 4.98     | 4.2      | 5.45     | 4.51     |
| $f_{15}$ | 4.72     | 4.89     | 5.54     | 4.12     | 95.36    | 6.34     | 6.5      | 6.13     | 4.98     | 95.8     | 94.55    | 4.51     |
| $f_{16}$ | 4.72     | 4.89     | 5.54     | 4.12     | 95.36    | 6.34     | 6.5      | 6.13     | 4.98     | 4.2      | 94.55    | 4.51     |
| $f_{17}$ | 4.72     | 4.89     | 5.54     | 4.12     | 4.64     | 93.66    | 93.5     | 6.13     | 4.98     | 4.2      | 94.55    | 95.49    |
| $f_{18}$ | 4.72     | 4.89     | 5.54     | 4.12     | 4.64     | 93.66    | 93.5     | 6.13     | 4.98     | 4.2      | 5.45     | 95.49    |
| $f_{19}$ | 4.72     | 4.89     | 5.54     | 4.12     | 95.36    | 6.34     | 6.5      | 6.13     | 4.98     | 4.2      | 94.55    | 4.51     |
| $f_{20}$ | 4.72     | 4.89     | 5.54     | 4.12     | 95.36    | 6.34     | 6.5      | 6.13     | 95.02    | 95.8     | 94.55    | 4.51     |
| $f_{21}$ | 4.72     | 4.89     | 5.54     | 4.12     | 4.64     | 6.34     | 6.5      | 6.13     | 4.98     | 4.2      | 5.45     | 4.51     |
| $f_{22}$ | 4.72     | 4.89     | 5.54     | 4.12     | 4.64     | 6.34     | 6.5      | 6.13     | 4.98     | 4.2      | 5.45     | 4.51     |
| $f_{23}$ | 4.72     | 4.89     | 5.54     | 4.12     | 4.64     | 6.34     | 6.5      | 6.13     | 4.98     | 4.2      | 5.45     | 4.51     |
| $f_{24}$ | 4.72     | 4.89     | 5.54     | 4.12     | 4.64     | 6.34     | 6.5      | 6.13     | 4.98     | 4.2      | 5.45     | 4.51     |
| $f_{25}$ | 4.72     | 95.11    | 5.54     | 4.12     | 4.64     | 6.34     | 6.5      | 6.13     | 4.98     | 4.2      | 5.45     | 4.51     |
| $f_{26}$ | 95.28    | 4.89     | 5.54     | 4.12     | 4.64     | 6.34     | 6.5      | 6.13     | 4.98     | 4.2      | 5.45     | 4.51     |
| $f_{27}$ | 4.72     | 4.89     | 94.46    | 4.12     | 4.64     | 6.34     | 6.5      | 6.13     | 4.98     | 4.2      | 5.45     | 4.51     |
| $f_{28}$ | 4.72     | 4.89     | 5.54     | 95.88    | 4.64     | 6.34     | 6.5      | 6.13     | 4.98     | 4.2      | 5.45     | 4.51     |
